# Supplementary material for: Expression and potential role of cellular retinol binding protein I in psoriasis
Source: PubMed Central journal article supplement (PMC6298411; doi:10.18632/oncotarget.26314), 2018-12-04
Supplement: oncotarget-09-36736-s001.pdf [file oncotarget-09-36736-s001.pdf]

## Expression and potential role of cellular retinol binding protein I in psoriasis

### SUPPLEMENTARY MATERIALS

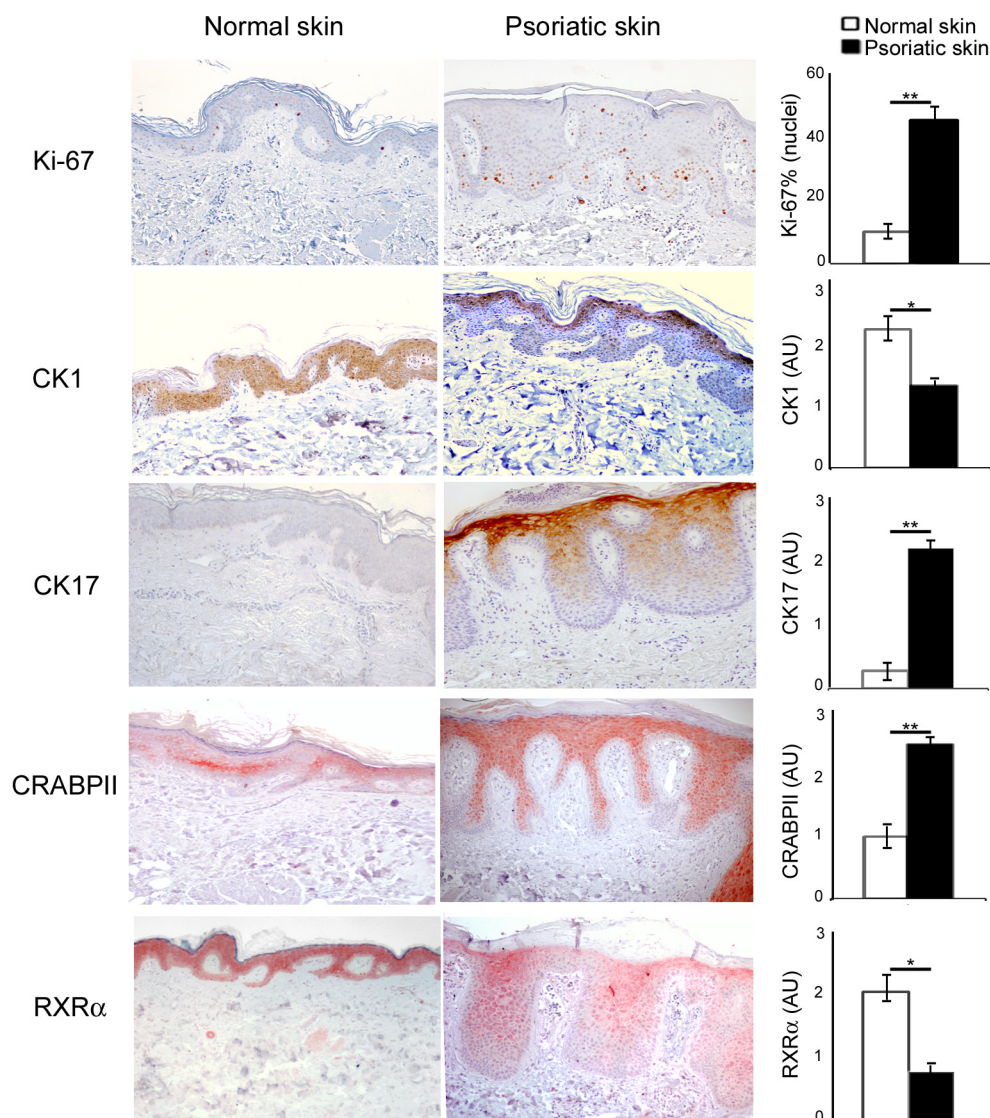

#### Supplementary Figure 1: Expression of Ki-67, CK1, CK17, CRABP II and RXRα in human normal and psoriatic skin.

Left panel: Representative immunostaining showing an increase of epidermal Ki-67 positive nuclei, CK17 and CRABP II expression in psoriatic skin; whereas RXRα and CK1 expression decrease. Original magnification, 100X. \* $p < 0.05$ ; \*\* $p < 0.01$  at Student's *t*-test. Right panel: Bar graphs showing the percentages of markers expression in normal and psoriatic skin.

**Supplementary Table 1: Biostatistical analysis of selected CRBPI SNPs**

| Selected SNPs             |          |                           |          |                           |          |                           |          |
|---------------------------|----------|---------------------------|----------|---------------------------|----------|---------------------------|----------|
| rs184157 A/G              |          | rs295493 A/G              |          | rs893704 G/T              |          | rs2071387 C/T             |          |
| Allele Frequency          | <i>p</i> | Allele Frequency          | <i>p</i> | Allele Frequency          | <i>p</i> | Allele Frequency          | <i>p</i> |
| <b>Cases</b>              |          | <b>Cases</b>              |          | <b>Cases</b>              |          | <b>Cases</b>              |          |
| A: 0.224                  |          | A: 0.37                   |          | G: 0.43                   |          | C: 0.23                   |          |
| G: 0.776                  |          | G: 0.63                   |          | T: 0.57                   |          | T: 0.77                   |          |
| <b>Controls</b>           |          | <b>Controls</b>           |          | <b>Controls</b>           |          | <b>Controls</b>           |          |
| A: 0.224                  |          | A: 0.36                   |          | G: 0.40                   |          | C: 0.20                   |          |
| G: 0.776                  |          | G: 0.64                   |          | T: 0.60                   |          | T: 0.80                   |          |
| <b>Genotype Frequency</b> |          | <b>Genotype Frequency</b> |          | <b>Genotype Frequency</b> |          | <b>Genotype Frequency</b> |          |
| <i>p</i>                  |          | <i>p</i>                  |          | <i>p</i>                  |          | <i>p</i>                  |          |
| <b>Cases</b>              |          | <b>Cases</b>              |          | <b>Cases</b>              |          | <b>Cases</b>              |          |
| AA: 0.04                  |          | AA: 0.15                  |          | GG: 0.17                  |          | CC: 0.04                  |          |
| AG: 0.36                  |          | AG: 0.45                  |          | GT: 0.51                  |          | CT: 0.36                  |          |
| GG: 0.60                  |          | GG: 0.40                  |          | TT: 0.32                  |          | TT: 0.60                  |          |
| <b>Controls</b>           |          | <b>Controls</b>           |          | <b>Controls</b>           |          | <b>Controls</b>           |          |
| AA: 0.04                  |          | AA: 0.12                  |          | GG: 0.18                  |          | CC: 0.04                  |          |
| AG: 0.38                  |          | AG: 0.48                  |          | GT: 0.44                  |          | CT: 0.31                  |          |
| GG: 0.58                  |          | GG: 0.40                  |          | TT: 0.38                  |          | TT: 0.65                  |          |

**Supplementary Table 2: Haplotype analysis**

| <b>Haplotypes</b> | <b>Psv patients Frequencies</b> | <b>Control subjects Frequencies</b> | <b><i>p</i></b> |
|-------------------|---------------------------------|-------------------------------------|-----------------|
| G-A-G-C           | 0.036                           | 0.027                               |                 |
| G-A-G-T           | 0.154                           | 0.142                               |                 |
| G-A-T-C           | 0.003                           | 0                                   |                 |
| G-A-T-T           | 0.008                           | 0.007                               |                 |
| G-G-G-C           | 0.097                           | 0.106                               |                 |
| G-G-G-T           | 0.014                           | 0.004                               |                 |
| G-G-T-C           | 0.013                           | 0                                   |                 |
| G-G-T-T           | 0.45                            | 0.4873                              |                 |
| A-A-G-C           | 0.03                            | 0.016                               | ns              |
| A-A-G-T           | 0.08                            | 0.101                               |                 |
| A-A-T-C           | 0.033                           | 0.032                               |                 |
| A-A-T-T           | 0.02                            | 0.022                               |                 |
| A-G-G-C           | 0.002                           | 0.003                               |                 |
| A-A-G-T           | 0.002                           | 0                                   |                 |
| A-G-T-C           | 0.008                           | 0                                   |                 |
| A-G-T-T           | 0.03                            | 0.04995                             |                 |

**Supplementary Table 3: Analyzed genes array.**

**See Supplementary File 1**
